# Supplementary material
Source: PubMed Central journal article supplement (PMC5113300)
Supplement: cr2016101x1.pdf [file cr2016101x1.pdf]

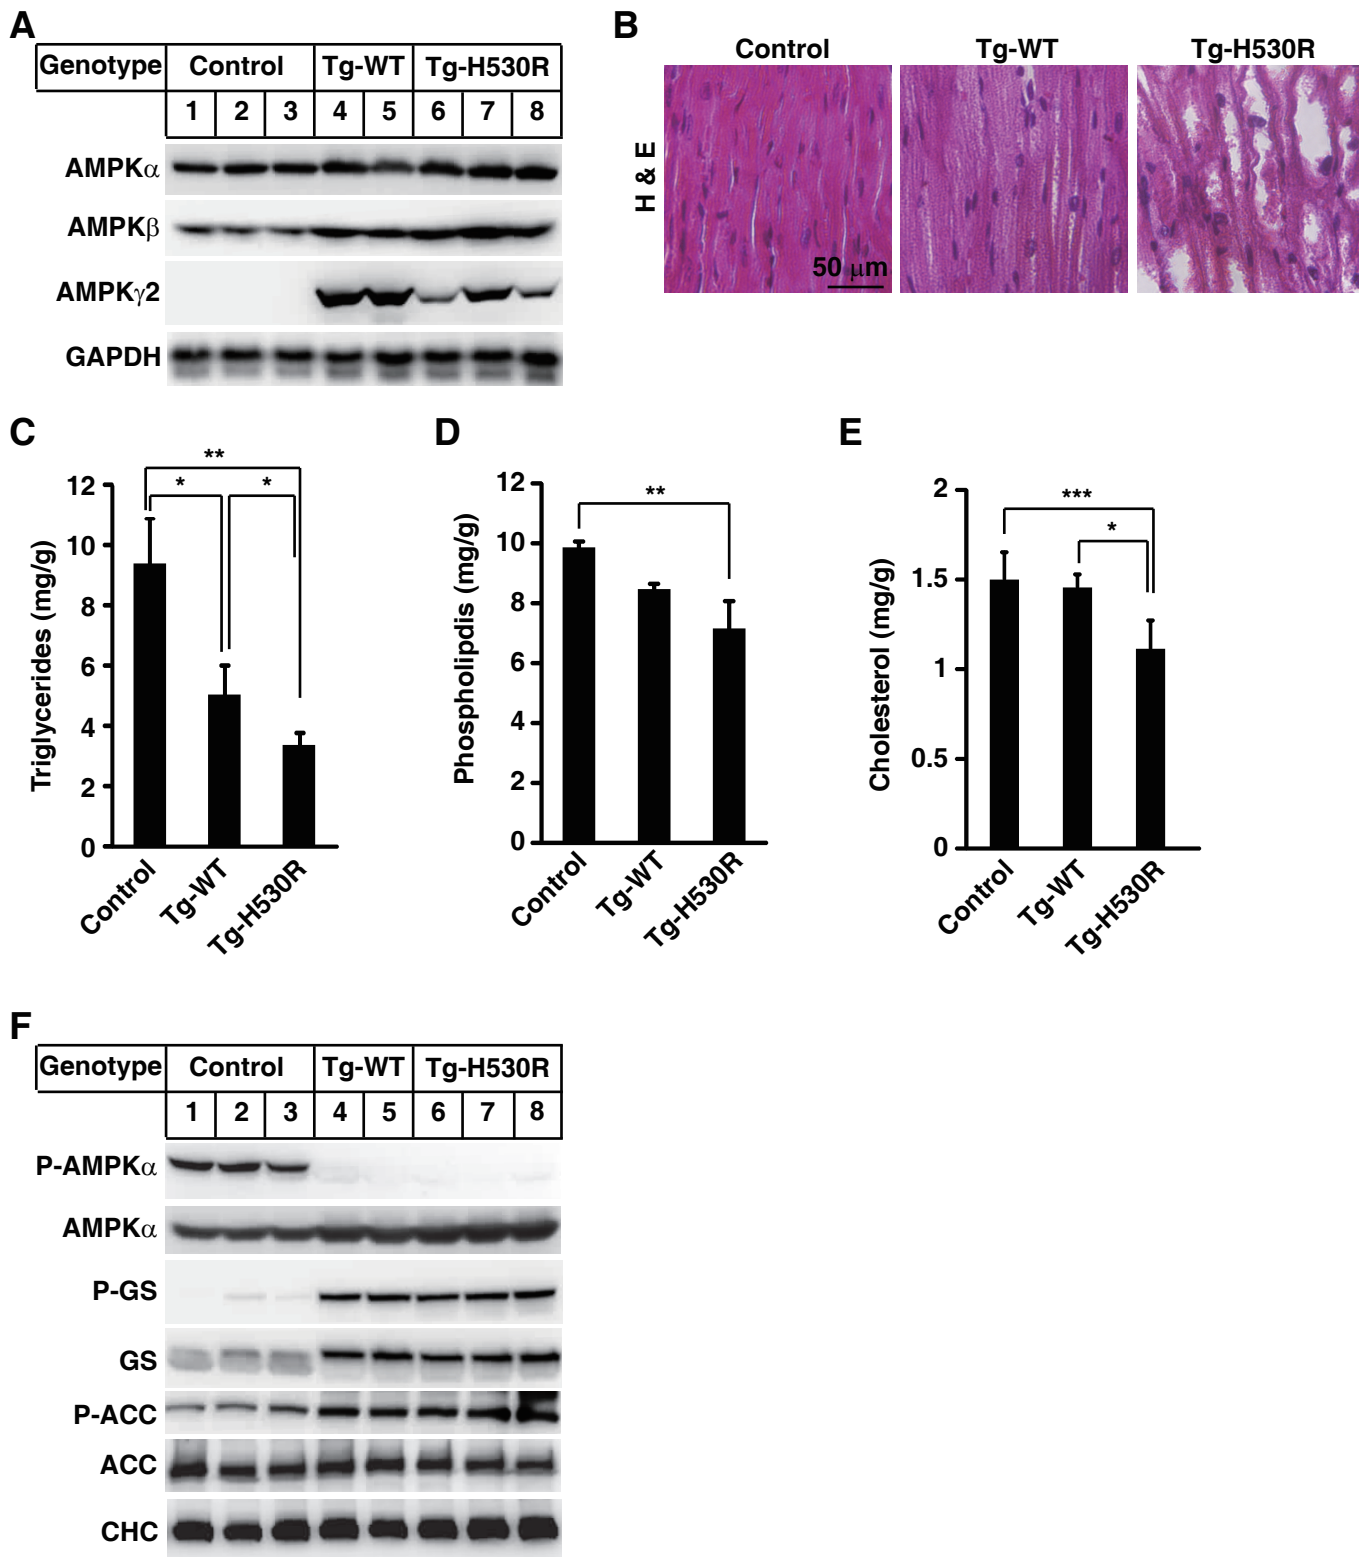

**Supplementary information, Figure S1. PRKAG2-H530R transgenic mice develop cardiac hypertrophy.**

(A) Protein levels of AMPK subunits analyzed by immunoblotting.

(B) H&E staining of paraffin embedded sections of hearts.

(C-E) Measurements of cardiac triglycerides (C), phospholipids (D) and cholesterol (E) from the heart of 8-week-old mice as indicated. One-way ANOVA was used to analyze overall differences between all groups (n=5).

Unpaired two-tailed Student's t-test for single comparison, \*p<0.05, \*\*p<0.01, \*\*\*p<0.001.

(F) Protein levels of phosphorylated AMPK and downstream enzymes by immunoblots of heart tissue from mice as indicated.
