# Supplementary material
Source: PubMed Central journal article supplement (PMC5113300)
Supplement: cr2016101x2.pdf [file cr2016101x2.pdf]

**A**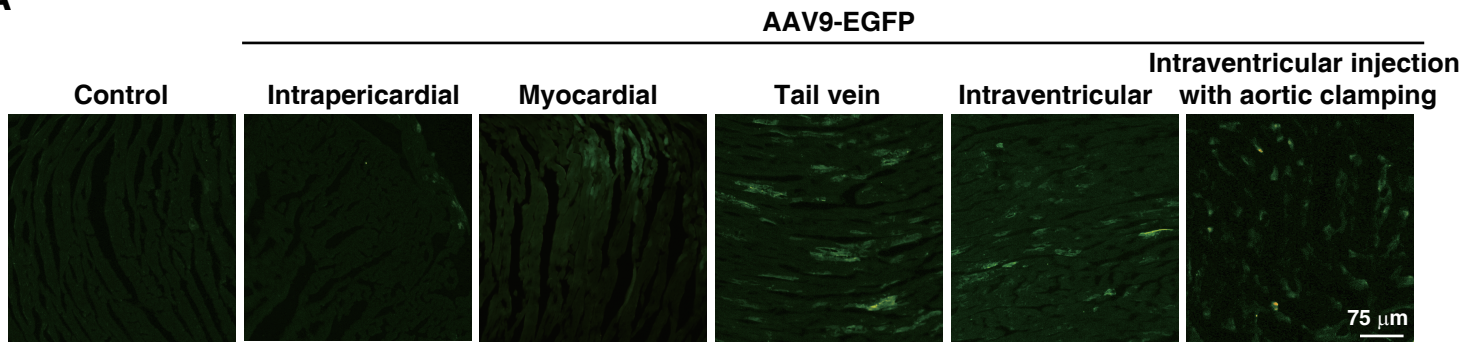**B**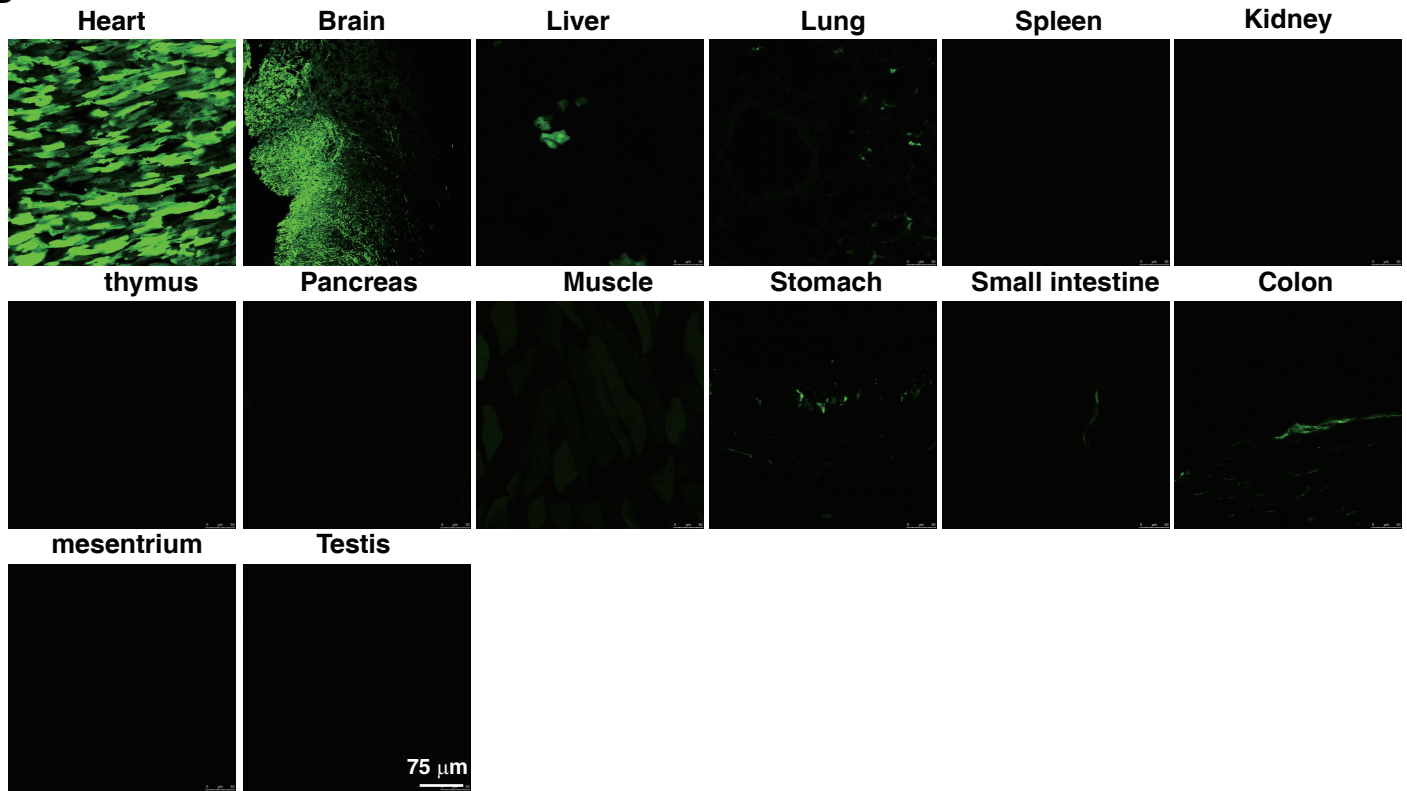**C**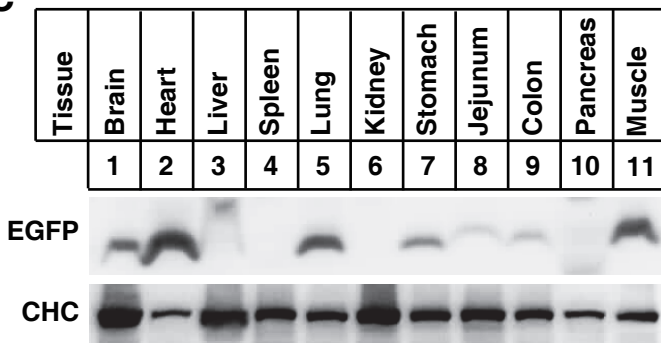**D**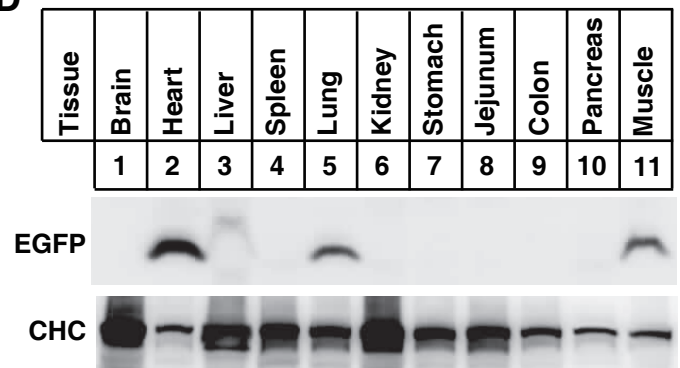

**Supplementary information, Figure S2. AAV9-mediated EGFP expression in C57BL/6 mice.**

(A) Evaluation of different injection approaches for AAV9-EGFP in 3-4 week-old mice. EGFP expression following different administration routes 2 weeks after injection of  $5 \times 10^{11}$  AAV9-EGFP.

(B) EGFP expression in different tissues 1 month after intraventricular injection of  $2.5 \times 10^{11}$  AAV9-EGFP at P4.

(C) Immunoblot showing EGFP expression in different tissues of mice receiving intraventricular injection at P4.

(D) Immunoblot showing EGFP expression in different tissues of mice receiving intravenous injection at P42.
