# Supplementary material
Source: PubMed Central journal article supplement (PMC5113300)
Supplement: cr2016101x3.pdf [file cr2016101x3.pdf]

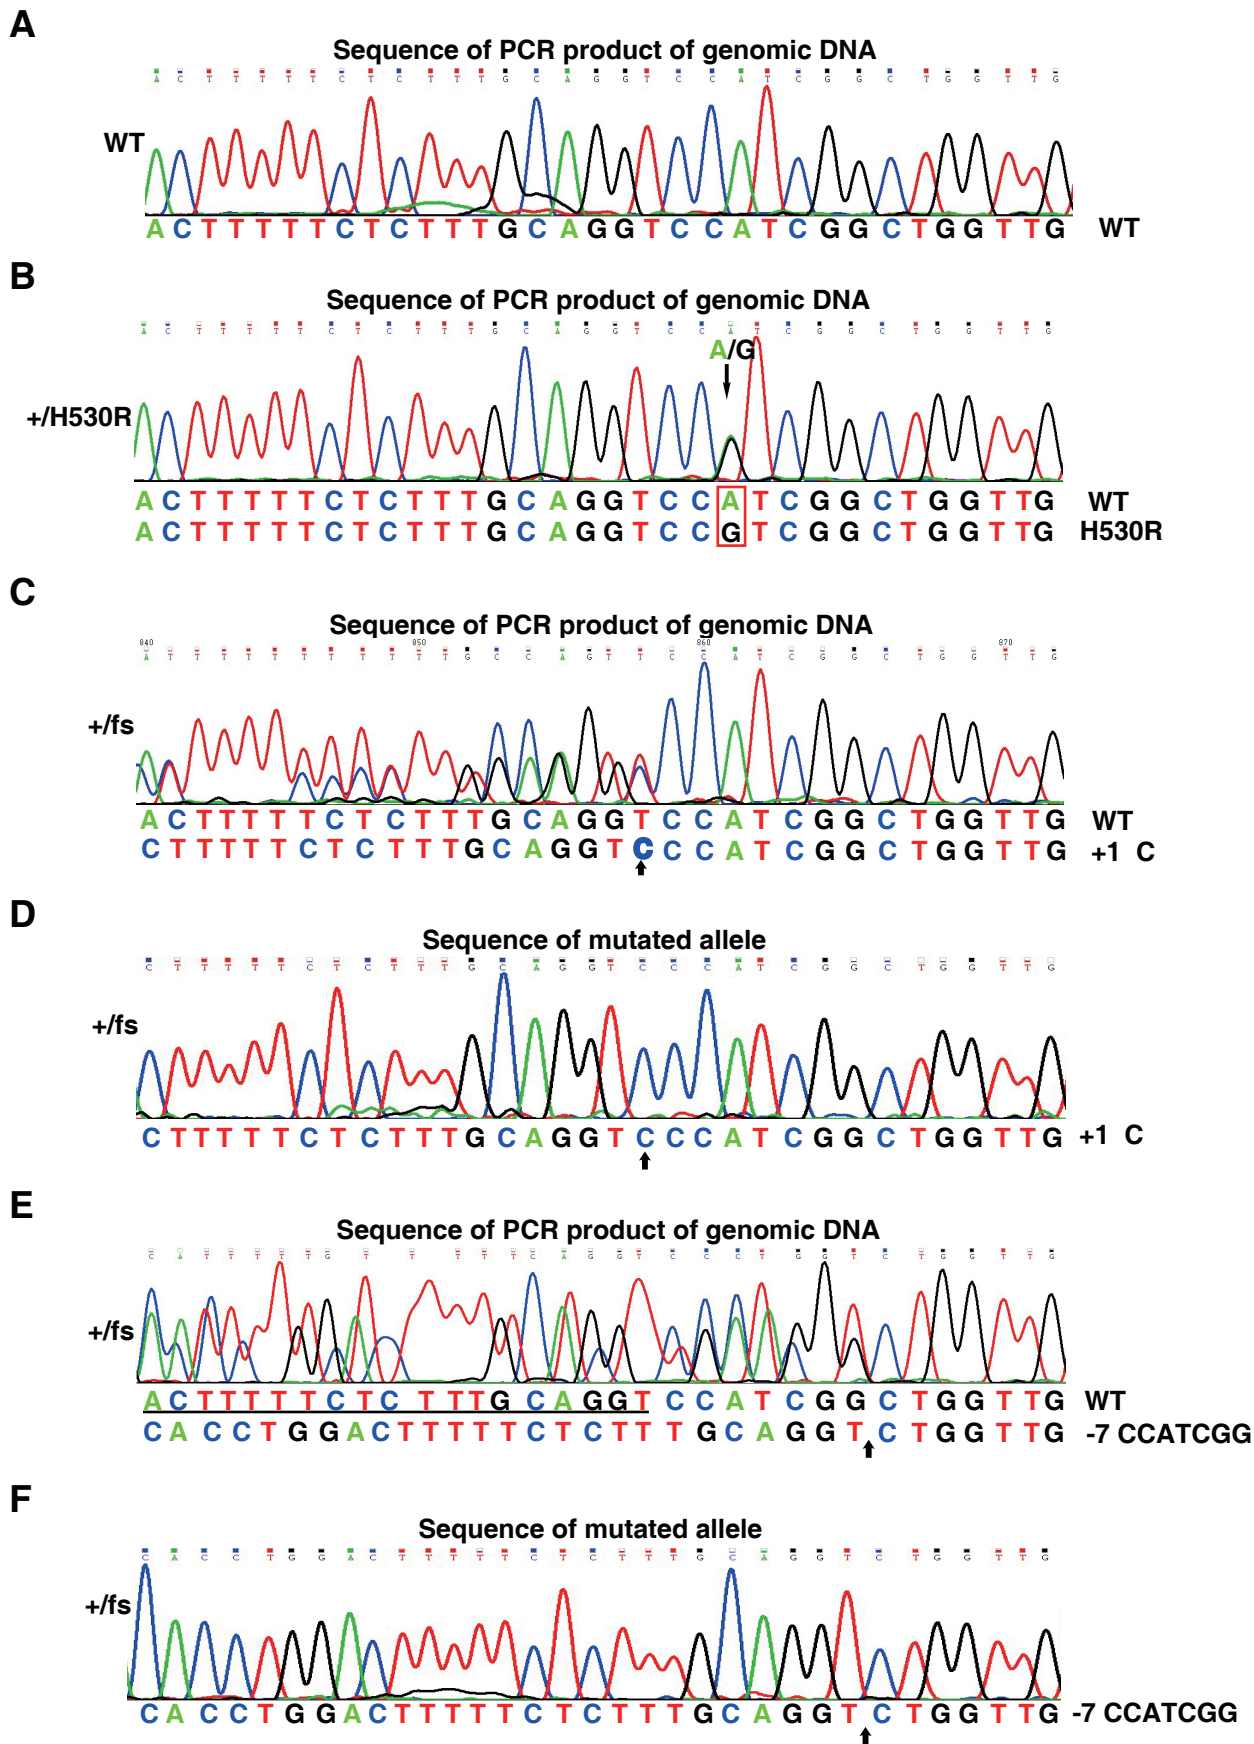

**Supplementary information, Figure S3. Sequencing of H530R knock-in mouse and frame-shift mutant mouse strains.**

(A) Sequence of PCR product of genomic DNA from wild type mouse.

(B) Sequence of PCR product of genomic DNA from heterozygous H530R knock-in mouse.

(C, E) Sequence of PCR product of genomic DNA from two lines of heterozygous frameshift mutant mice.

(D) Sequence of mutant allele in (C).

(F) Sequence of mutant allele in (E).
