# Supplementary material
Source: PubMed Central journal article supplement (PMC5113300)
Supplement: cr2016101x6.pdf [file cr2016101x6.pdf]

Supplementary information, Table S1. Predicted off-target sites of sgRNA-m3 in human and mouse genomes.

|                     |                                  | sequence                         | score                  | mismatches              | locus                   |
|---------------------|----------------------------------|----------------------------------|------------------------|-------------------------|-------------------------|
|                     | <b>sgRNA-m3</b>                  | TTTTCTCTTTGCAGGTCC <b>G</b> T    |                        |                         |                         |
| <b>Human Genome</b> | <b>h-H530R</b>                   | TTTTCTCTTTGCAGGTCC <b>G</b> TCGG |                        | <b>0 MisMatches</b>     | <b>chr7:-151257690</b>  |
|                     | <b>h-WT</b>                      | TTTTCTCTTTGCAGGTCC <b>A</b> TCGG | <b>31.5</b>            | <b>1MMs [19]</b>        | <b>chr7:-151257690</b>  |
|                     | <b>h-OT1</b>                     | TTTTATCTTTGCAGGTCTGTCAG          | <b>2.2</b>             | <b>2MMs [5:18]</b>      | <b>chr11:+101612313</b> |
|                     | <b>h-OT2</b>                     | CGGCCTCTTTGCAGGTCCGTGGG          | <b>1.3</b>             | <b>4MMs [1:2:3:4]</b>   | <b>chr12:-110035578</b> |
|                     | <b>h-OT3</b>                     | CTGCCTCTCTGCAGGTCCGTAAG          | <b>0.8</b>             | <b>4MMs [1:3:4:9]</b>   | <b>chr3:+46905238</b>   |
|                     | <b>h-OT4</b>                     | TCTTTTCACTGCAGGTCCGTGGG          | <b>0.8</b>             | <b>4MMs [2:5:8:9]</b>   | <b>chr3:-127607473</b>  |
|                     | <b>h-OT5</b>                     | TTTTCTCTTTTCAGGTCTGTTAG          | <b>0.8</b>             | <b>2MMs [11:18]</b>     | <b>chr13:+23769655</b>  |
|                     | <b>h-OT6</b>                     | TTTTCTGCTTGCAGGTTCGTCAG          | <b>0.7</b>             | <b>3MMs [7:8:17]</b>    | <b>chr2:-121996474</b>  |
|                     | <b>h-OT7</b>                     | ATTCCTCGTTGCGGGTCCGTGGG          | <b>0.6</b>             | <b>4MMs [1:4:8:13]</b>  | <b>chr18:-72591353</b>  |
|                     | <b>h-OT8</b>                     | TCTTCTTTTTGCAGTCCGTTGG           | <b>0.6</b>             | <b>3MMs [2:7:15]</b>    | <b>chr22:+39410049</b>  |
|                     | <b>h-OT9</b>                     | CTTCTCTTTGAAGTCCTTTGG            | <b>0.6</b>             | <b>3MMs [1:12:19]</b>   | <b>chr7:-127073516</b>  |
| <b>h-OT10</b>       | TTGCATCTTTGCAGGTCC <b>T</b> TAAG | <b>0.5</b>                       | <b>4MMs [3:4:5:19]</b> | <b>chr12:-119535004</b> |                         |
|                     |                                  |                                  |                        |                         |                         |
| <b>Mouse genome</b> | <b>m-H530R</b>                   | TTTTCTCTTTGCAGGTCC <b>G</b> TCGG |                        | <b>0 MisMatches</b>     | <b>chr5:-24371977</b>   |
|                     | <b>m-WT</b>                      | TTTTCTCTTTGCAGGTCC <b>A</b> TCGG | <b>31.5</b>            | <b>1MMs [19]</b>        | <b>chr5:-24371977</b>   |
|                     | <b>m-OT1</b>                     | TTGTTTTTTTGCAGGTCCGTCAG          | <b>1.6</b>             | <b>3MMs [3:5:7]</b>     | <b>chr13:-99614562</b>  |
|                     | <b>m-OT2</b>                     | TTGGGTCTTGGCAGGTCCGTTGG          | <b>1.3</b>             | <b>4MMs [3:4:5:10]</b>  | <b>chr4:+83633358</b>   |
|                     | <b>m-OT3</b>                     | TTTTTTTTTTCCAGGTCCGTAAG          | <b>1</b>               | <b>3MMs [5:7:11]</b>    | <b>chr18:+87323263</b>  |
|                     | <b>m-OT4</b>                     | CTTTTTCCTTGCAGGTCCCTCAG          | <b>0.5</b>             | <b>4MMs [1:5:8:19]</b>  | <b>chr6:+97421046</b>   |
|                     | <b>m-OT5</b>                     | ATTCGTCTTTGCAGGTCC <b>T</b> TTAG | <b>0.5</b>             | <b>4MMs [1:4:5:19]</b>  | <b>chr15:-99158189</b>  |
|                     | <b>m-OT6</b>                     | TTTTCTAAAGGCAGGTCCGTGGG          | <b>0.5</b>             | <b>4MMs [7:8:9:10]</b>  | <b>chr17:+44236548</b>  |
|                     | <b>m-OT7</b>                     | TTTTTTCTTTGGAGGTCCCTGGG          | <b>0.5</b>             | <b>3MMs [5:12:19]</b>   | <b>chr6:+70814826</b>   |
|                     | <b>m-OT8</b>                     | TTTTCTCTTTGCAGGTCTGCGAG          | <b>0.4</b>             | <b>2MMs [18:20]</b>     | <b>chr1:+176431598</b>  |
|                     | <b>m-OT9</b>                     | TTTGTTCTGTGTAGGTCCGTCAG          | <b>0.4</b>             | <b>4MMs [4:5:9:12]</b>  | <b>chr3:+19457592</b>   |
| <b>m-OT10</b>       | CATTTTCTTTGCAGTCCGTTAG           | <b>0.4</b>                       | <b>4MMs [1:2:5:15]</b> | <b>chr19:+9189444</b>   |                         |
