# Supplementary material
Source: PubMed Central journal article supplement (PMC5113300)
Supplement: cr2016101x7.pdf [file cr2016101x7.pdf]

**Supplementary information, Table S2. PCR Primers of predicted on-target and off-target sites of sgRNA-m3 for deep sequencing.**

|              | On and Off-target sites | Primers                     | Primer sequence (from 5' to 3') |
|--------------|-------------------------|-----------------------------|---------------------------------|
| Human genome | h-ON                    | h-ON-F                      | GCCTTGATCTGTAGGTGGGT            |
|              |                         | h-ON-R                      | CAGGACATTATTTCTCATGTCCATTT      |
|              | h-OT1                   | h-OT1F                      | CTGTGTTCCCTCCCTCAGAAG           |
|              |                         | h-OT1R                      | GATCTCAAGTGCACGCAGGA            |
|              | h-OT2                   | h-OT2F                      | GCAGTCAGCTTGGTGCTTTC            |
|              |                         | h-OT2R                      | TTCACTCTCACGTTCCCAGC            |
|              | h-OT3                   | h-OT3F                      | GGCTCAGGAATGGGTAGTGG            |
|              |                         | h-OT3R                      | AGACACAGACACAGGGACT             |
|              | h-OT4                   | h-OT4F                      | TGGGAGTAGACATCCATAGGCT          |
|              |                         | h-OT4R                      | CACCTCAGCACTCAATTGCTTT          |
|              | h-OT5                   | h-OT5F                      | TGTCTGAATTGCCTACCCGT            |
|              |                         | h-OT5R                      | ACTCTGCCATTTTAAAAAGTCCCT        |
|              | h-OT6                   | h-OT6F                      | CACTACTGGCCCCCATGAATA           |
|              |                         | h-OT6R                      | TCCCTCTTACAAAGAAAGAAGATT        |
|              | h-OT7                   | h-OT7F                      | TTCTGTGTCTACCCCCGCTT            |
|              |                         | h-OT7R                      | GCTTCATTGCTGTCCCACAC            |
|              | h-OT8                   | h-OT8F                      | TGCTTATTGAATGATATGGCACAA        |
|              |                         | h-OT8R                      | AGAAAGAATAGAGTAGATGGGCTGT       |
|              | h-OT9                   | h-OT9F                      | CTGGGGTCTCAAACCTCCC             |
|              |                         | h-OT9R                      | CATGTTTCTCTGGCTCTGGC            |
| h-OT10       | h-OT10F                 | GTTTGCTCACGGAGAAGAATGA      |                                 |
|              | h-OT10R                 | CCAAACAACACTTTTTAATGCCTTATT |                                 |
| Mouse genome | m-ON                    | m-ON-F                      | TTTTACCTGCTGGTGTGAGGATCAG       |
|              |                         | m-ON-R                      | TAAGTGAAGCAATGAAAAAC            |
|              | m-OT1                   | m-OT1F                      | GTACAGTGACGGCAACACCTC           |
|              |                         | m-OT1R                      | GACTGTCCAGAGTCTCAGAAGAA         |
|              | m-OT2                   | m-OT2F                      | TTCTTTTCCAGCCTGACGCC            |
|              |                         | m-OT2R                      | GTGGTTCAGTGAAGGTCGCT            |
|              | m-OT3                   | m-OT3F                      | TCCTGCTTCATTTTAAACAACAACAA      |
|              |                         | m-OT3R                      | AAATCTAACTAGCACACCTCTTAGT       |
|              | m-OT4                   | m-OT4F                      | AAAGAGGCACAGGGCTGAAA            |
|              |                         | m-OT4R                      | CAGAGAGCCAGCGACTAAACA           |
|              | m-OT5                   | m-OT5F                      | AATGCCTGTTCCCTCACTAGG           |
|              |                         | m-OT5R                      | CTGATGTACTGCCCGCTTTC            |
|              | m-OT6                   | m-OT6F                      | ACCACTGGTCCACCAACAAG            |
|              |                         | m-OT6R                      | TTTAGTGCCAGCCAGCCAGAA           |
|              | m-OT7                   | m-OT7F                      | CTTGAAAAGGTATGGAGATTTGGCT       |
|              |                         | m-OT7R                      | TATTCTGTGTGTGTGCAAGAGCAT        |
|              | m-OT8                   | m-OT8F                      | AGACAGGACAGTCCACCCAT            |
|              |                         | m-OT8R                      | TGGGACCTTCATCTCCACCT            |
|              | m-OT9                   | m-OT9F                      | AGGCATCCAGCCAAGTGATT            |
|              |                         | m-OT9R                      | AAACAGACAGCCCAGGAGTG            |
| m-OT10       | m-OT10F                 | GTGTTATTGTTTCGCAGGCTGT      |                                 |
|              | m-OT10R                 | TCACCTGTCCTAGTGCGTTC        |                                 |
