# Supplementary material
Source: PubMed Central journal article supplement (PMC5113300)
Supplement: cr2016101x8.pdf [file cr2016101x8.pdf]

**Table S3. Predicted off-target sites of sgRNA-1 in mouse genome.**

Possible off-target sites were predicted as described in Materials and Methods. Five sites with 3-base mismatches and 5 sites with 4-base mismatches and high-scoring were chosen for Surveyor assay.

| <b>sgRNA-1</b>                    |              |                   |              |                  |
|-----------------------------------|--------------|-------------------|--------------|------------------|
| TAGTAAGAGCTGAGGTCCGT              |              |                   |              |                  |
| <b>Top genome-wide off-target</b> |              |                   |              |                  |
| <b>sequence</b>                   | <b>score</b> | <b>mismatches</b> | <b>label</b> | <b>locus</b>     |
| GAGTCAGAACTGAGGTCCGTGAG           | 1.6          | 3MMs [1:5:9]      | OT-1         | chr1:-107924912  |
| CAGGAAAAGTTGAGGTCCGTGAG           | 0.9          | 4MMs [1:4:7:10]   | OT-2         | chr10:-21145428  |
| TGGAAAGAGGAGAGGTCCGTAGG           | 0.7          | 4MMs [2:4:10:11]  | OT-3         | chr3:-31398650   |
| GAGTAAGAACTGAGGTCCATAAG           | 0.7          | 3MMs [1:9:19]     | OT-4         | chr14:-41981068  |
| GAGGCAGAGCTGAGGTTCGTGGG           | 0.6          | 4MMs [1:4:5:17]   | OT-5         | chr17:-46832870  |
| CAGTAAGTGTTGAGGTTCGTGAG           | 0.6          | 4MMs [1:8:10:17]  | OT-6         | chrX:+163004146  |
| TAGAGAGAGATGAGGTACGTGGG           | 0.5          | 4MMs [4:5:10:17]  | OT-7         | chr1:+186211390  |
| TATACAGAGCTGAGGTCCCTTGGG          | 0.5          | 4MMs [3:4:5:19]   |              | chr4:-57026988   |
| TGGTTAGAGGTGAGGTCCCTTGGG          | 0.5          | 4MMs [2:5:10:19]  |              | chr1:-195695078  |
| TAGTAACTGAAGAGGTCCGTGGG           | 0.5          | 4MMs [7:8:10:11]  |              | chr15:-25943556  |
| TGGAAGGAGCTTAGGTCCGTAGG           | 0.4          | 4MMs [2:4:6:12]   |              | chr8:+24267523   |
| CAGTGGGAGCTGAGGTCCGAGGG           | 0.4          | 4MMs [1:5:6:20]   |              | chr8:-19312258   |
| TTGTCAGAGGTGAGTTCCTGAG            | 0.4          | 4MMs [2:5:10:15]  |              | chr11:+82671514  |
| TAGAGAAAAGCTGAGGTCCCTTAGG         | 0.3          | 4MMs [4:5:7:19]   |              | chr8:-89295418   |
| AAGAAAGTGCTGAGGTCTGTGAG           | 0.3          | 4MMs [1:4:8:18]   |              | chr1:-113703635  |
| CAGGCAGAGCTGAGGTCTGTGGG           | 0.3          | 4MMs [1:4:5:18]   |              | chr15:-72844924  |
| GAGCATGAGCTGAGGTCCCTTGGG          | 0.3          | 4MMs [1:4:6:19]   |              | chr11:+115710138 |
| TAGTAAAAGCTAAGGTCCCTTGG           | 0.3          | 3MMs [7:12:19]    | OT-8         | chr13:+69901881  |
| TAGGAATAGATGAGGTCCCTCAG           | 0.3          | 4MMs [4:7:10:19]  |              | chr8:-37145519   |
| TGATGAGAGCTGAGGTGAGTGG            | 0.3          | 4MMs [2:3:5:18]   |              | chr6:+142822525  |
| AAGTAAGAGCAGAGGCCCGTCCG           | 0.3          | 3MMs [1:11:16]    | OT-9         | chr2:+102053997  |
| TATTGAGAGTTGAGGTGAGTGGG           | 0.3          | 4MMs [3:5:10:18]  |              | chr8:-5466752    |
| AAGGCAGAGCTGAGGCCCGTTAG           | 0.3          | 4MMs [1:4:5:16]   |              | chr12:+77242731  |
| TAGTAGCGGCTGAGGTCCGAGGG           | 0.3          | 4MMs [6:7:8:20]   |              | chr4:-43524738   |
| GAGTGAGAGCTCAGGTCCCTGGG           | 0.3          | 4MMs [1:5:12:19]  |              | chr7:-121968004  |
| TGGGAAGAGGTGAGGACCGTAAG           | 0.2          | 4MMs [2:4:10:16]  |              | chr7:-116331715  |
| TAGAGAAAAGCTGAGGTGAGTGGG          | 0.2          | 4MMs [4:5:7:18]   |              | chr4:+138638448  |
| GAGTAAGAGTTGAGGTCCCTGGG           | 0.2          | 4MMs [1:10:19:20] |              | chr13:-34332518  |
| TAGTCAGAGCTGAGGTCCGTAAG           | 0.2          | 3MMs [5:16:17]    | OT-10        | chr12:+12318505  |
