# Supplementary material
Source: PubMed Central journal article supplement (PMC5113300)
Supplement: cr2016101x9.pdf [file cr2016101x9.pdf]

**Supplementary information, Table S4. PCR Primers of predicted on-target and off-target sites of sgRNA-1 for surveyor assay.**

| <b>Primers of on-target and off-target sites predicted for sgRNA-1 (from 5' to 3')</b> |                |                          |
|----------------------------------------------------------------------------------------|----------------|--------------------------|
| <b>Transgene</b>                                                                       | <b>OnT-F</b>   | TCTGCCTGTTGTGGATGAGTC    |
|                                                                                        | <b>OnT-R</b>   | CACTCCGTTTCTGTCTCCTTT    |
| <b>OT-1</b>                                                                            | <b>OT-1-F</b>  | CACCTGCAAGGGTCAGTGATAC   |
|                                                                                        | <b>OT-1-R</b>  | AAAGCCACACATTCTCTAAAAGCG |
| <b>OT-2</b>                                                                            | <b>OT-2-F</b>  | AGCTGAAGACCAAGCCTCAC     |
|                                                                                        | <b>OT-2-R</b>  | TTCCTGCCATTAGCCCAGTG     |
| <b>OT-3</b>                                                                            | <b>OT-3-F</b>  | GGAACTCATGCAAATAGGCCAC   |
|                                                                                        | <b>OT-3-R</b>  | GAGGGCAGATTAGTAGGAGTGGA  |
| <b>OT-4</b>                                                                            | <b>OT-4-F</b>  | CTCAGGCATGTCCCTCTGTG     |
|                                                                                        | <b>OT-4-R</b>  | GTCAGATGGGATCTGTGCCC     |
| <b>OT-5</b>                                                                            | <b>OT-5-F</b>  | TCCAGAGTCAGACCAGAGAAGAT  |
|                                                                                        | <b>OT-5-R</b>  | GTTCAACGATTCAGGGCGAAC    |
| <b>OT-6</b>                                                                            | <b>OT-6-F</b>  | CGCTGAGAGATCACTGGGAC     |
|                                                                                        | <b>OT-6-R</b>  | CACCAGGTGTCTGGAGCAAT     |
| <b>OT-7</b>                                                                            | <b>OT-7-F</b>  | GACCAACAGATTCATGTGCCG    |
|                                                                                        | <b>OT-7-R</b>  | CCAGCAACTCTCCCCAAACA     |
| <b>OT-8</b>                                                                            | <b>OT-8-F</b>  | AACCCATCTGTGGTCCATGC     |
|                                                                                        | <b>OT-8-R</b>  | ACACAGCGCTCACCTCATAG     |
| <b>OT-9</b>                                                                            | <b>OT-9-F</b>  | ATGTGACAGACAAGCCCTGC     |
|                                                                                        | <b>OT-9-R</b>  | AGTCCCGGCAACAAGTGAAT     |
| <b>OT-10</b>                                                                           | <b>OT-10-F</b> | ACGGTGTGATTTCTTCAGC      |
|                                                                                        | <b>OT-10-R</b> | TATCTCGGAGACTGGAGCGT     |
